# Supplementary material
Source: publisher figshare collection journal article supplement (https://karger.figshare.com/ndownloader/files/13078241)

## SUPPLEMENTARY MATERIAL

# **lncRNA DLG1-AS1 Promotes Cell Proliferation by Competitively Binding with miR-107 and Up-Regulating ZHX1 Expression in Cervical Cancer**

Xiaohui Rui<sup>a</sup> Yun Xu<sup>a</sup> Yaqing Huang<sup>a</sup> Linjuan Ji<sup>a</sup> Xiping Jiang<sup>a</sup>

<sup>a</sup>Department of Gynecology, The Third Affiliated Hospital of Soochow University, Changzhou, China

**Supplementary Fig. 1.** Screening of differentially-expressed lncRNAs in cervical cancer. A. Analysis of differentially expressed genes in cervical cancer via lncRNA gene chip (Fold change >3.0,  $P < 0.01$  in t-test). B. Validation of 10 lncRNAs up-regulated the most significantly in cervical cancer tissues via qRT-PCR. ENSG00000227375 (DLG1-AS1) is up-regulated the most significantly in cervical cancer. C. Validation of 10 lncRNAs down-regulated the most significantly in cervical cancer tissues via qRT-PCR.

A

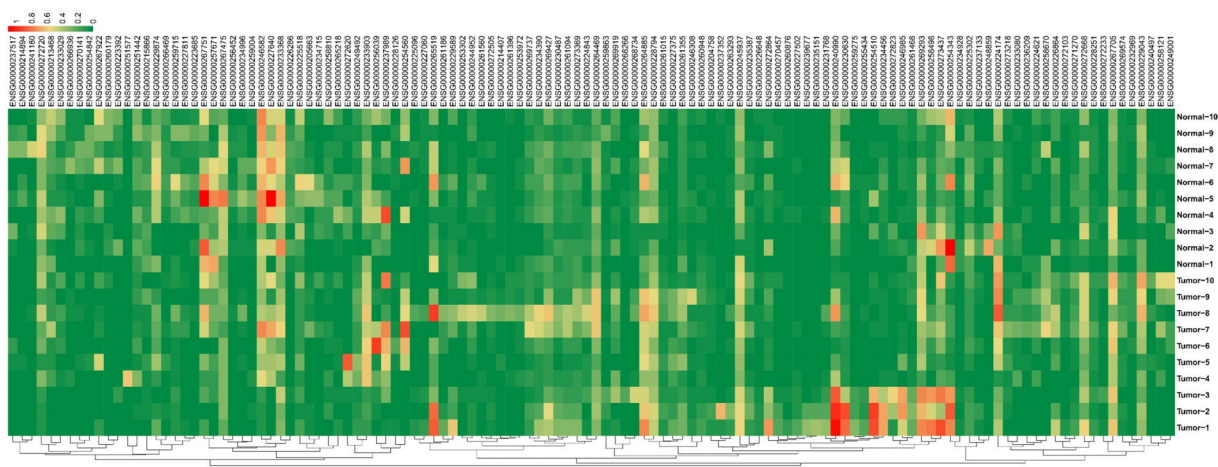

B

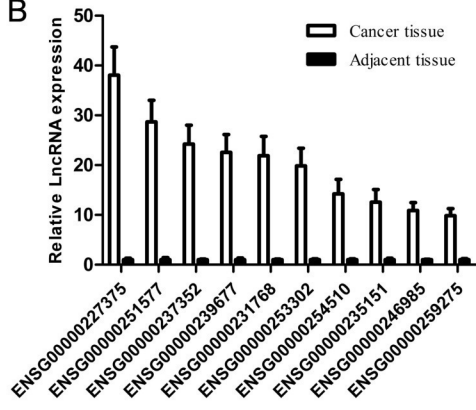

C

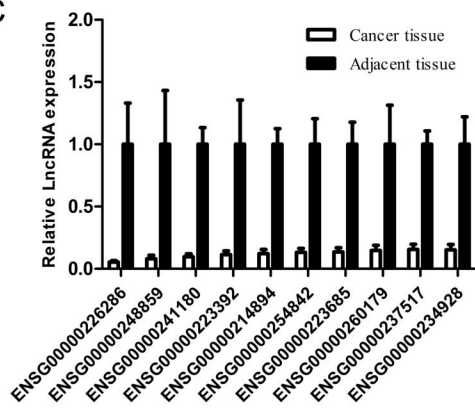

Supplement: Supplementary file 1 [file 13078241]
